# Supplementary material for: OxyEMG: an application for determination of the oxyspinel group end-members based on electron microprobe analyses
Source: Copernicus journal article supplement (doi:10.5194/ejm-36-87-2024), 2024-01-17
Supplement: Supplementary file 1 [file ejm-36-87-2024-supplement.zip]

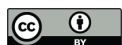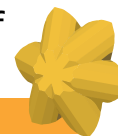

*Supplement of*

**OxyEMG: an application for determination of the oxyspinel group end-members based on electron microprobe analyses**

**Gabriela R. Ferracutti et al.**

*Correspondence to:* Gabriela R. Ferracutti (gferrac@uns.edu.ar)

- ejm-36-87-2024-supplement-title-page.pdf
- Table S1.xlsx
- Table S2.xlsx
- Table S3.xlsx
- Table S4.xlsx
- Table S5.xlsx
- Table S6.xlsx

The copyright of individual parts of the supplement might differ from the article licence.
