# Supplementary material for: OxyEMG: an application for determination of the oxyspinel group end-members based on electron microprobe analyses
Source: Copernicus journal article supplement (doi:10.5194/ejm-36-87-2024), 2024-01-17
Supplement: Supplementary file 1 [file Table S1.xlsx]

## Sheet: Hoja1
Table S1 Example of output .csv with discrimination Fe2O3 from FeO, Mn2O3 from MnO and Co2O3 from CoO when it is necesary
Sample	SiO2	TiO2	GeO2	Al2O3	Cr2O3	V2O3	Fe2O3	Mn2O3	Co2O3	FeO	MnO	MgO	CaO	ZnO	NiO	CuO	CoO	Total
Droop (1987) data	0	0	0	61.99	0	0	4.09838	0	0	20.9921	0.11	13.7	0	0	0	0	0	100.89
Coulsonite	0	0	0	0	0	67.6	0	0	0	32.4	0	0	0	0	0	0	0	100
Magnesiochromite	0	0	0	0	79.04	0	0	0	0	0	0	20.96	0	0	0	0	0	100
Chromite	0	0	0	0	67.9	0	0.0024543	0	0	32.0978	0	0	0	0	0	0	0	100
Zincochromite	0	0	0	0	65.13	0	0	0	0	0	0	0	0	34.87	0	0	0	100
Ulvöspinel	0	35.73	0	0	0	0	0.00861708	0	0	64.2622	0	0	0	0	0	0	0	100.001
Spinel	0	0	0	71.67	0	0	0	0	0	0	0	28.33	0	0	0	0	0	100
Magnesiocoulsonite	0	0	0	0	0	78.81	0	0	0	0	0	21.19	0	0	0	0	0	100
Hercynite	0	0	0	58.66	0	0	0.00392406	0	0	41.3365	0	0	0	0	0	0	0	100
Gahnite	0	0	0	55.61	0	0	0	0	0	0	0	0	0	44.39	0	0	0	100
Trevorite	0	0	0	0	0	0	68.13	0	0	0	0	0	0	0	31.87	0	0	100
Magnetite	0	0	0	0	0	0	68.97	0	0	31.03	0	0	0	0	0	0	0	100
Magnesioferrite	0	0	0	0	0	0	79.85	0	0	0	0	20.15	0	0	0	0	0	100
Jacobsite	0	0.09	0	0	0	0	73.96	0	0	2.57	13.94	9.26	0	0	0	0	0	99.82
Franklinite	0	0.7	0	1.25	0	0	63.9	0	0	3.6	0.6	0	0	30.25	0	0	0	100.3
Manganochromite	0	0	0	0	62.3	1.7	3.66281	0	0	6.10403	24	0	0	1.7	0	0	0	99.4668
Galaxite	0.96	0	0	45.71	0	0	14.0725	0	0	3.69693	34.03	1.5	0	0	0	0	0	99.9694
Qandilite T5 Bosi et al. (2014)	0	40.18	0	0	0	0	1.8829	0	0	38.3657	0	19.49	0	0	0	0	0	99.9186
Cuprospinel	0	0	0	2.6	0	0	65.7	0	0	1.7	0.2	1.8	0	0.7	0	27.8	0.6	101.1
Ringwoodite	38.9	0	0	0	0	0	0	0	0	23.4	0	37	0	0	0	0	0	99.3
Ahrensite	34.9	0	0	0	0	0	0	0	0	43.8	0.75	21.1	0	0	0	0	0	100.55
Brunogeierite	0	0	42.13	0	0	0	0.00763611	0	0	57.8631	0	0	0	0	0	0	0	100.001
Thermaerogenite	0	0	0	56.17	0	0	0	0	0	0	0	0	0	0	0	43.83	0	100
Cochromite de Waal (1978)	0.11	1.26	0	9.11	50.38	0	4.14084	0	0	7.45388	0.84	0.95	0	0.59	7.67	0	17.45	99.9547
Vuorelainenite	0	0.1	0	0	19.5	47.4	0.891781	0	0	4.89753	26.4	0.1	0	0.8	0	0	0	100.089
Nichromite de Waal (1978)	0.2	1.13	0	7.46	45.56	0	11.9797	0	0	6.54008	0.21	0.4	0	0	15.86	0	12.49	101.83
#5 Oktyabrsky et al. (1992)	0	27.34	0	3.33	0.13	0	27.01	0	0	14.62	1.89	26.47	0	0	0	0	0	100.79
#3 Oktyabrsky et al. (1992)	0	21.07	0	4.85	0	0	39.28	0	0	1.44	2.69	30.75	0	0	0	0	0	100.08
FeTi30A Bosi et al. (2009)	0	16.1	0	0	0	0	37.4842	0	0	45.82	0	0	0	0	0	0	0	99.4042
FeTi50Bd Bosi et al. (2009)	0	20.14	0	0.61	0	0	27.5451	0	0	49.0437	0	0	0	0	0	0	0	97.3387
RhumBAn2 Lenaz et al. (2011)	0	2.6	0	9	25.3	0.81	28.7692	0	0	30.8121	0.38	2.64	0	0.09	0.34	0	0	100.741
SC Salamanca district. Bjerg et al. (1993)	0	0	0	0.96	59.87	0	7.88	0	0	23.08	0	2.71	0	4.99	0	0	0	99.49
LTC Las Tunas Area. Bjerg et al. (1993)	0	0	0	24.3	40.43	0	4.24	0	0	18.44	0	9.73	0	0.87	0	0	0	98.01
2A Bosi et al. (2002). Mn discriminated	0	0	0	0	0	0	0	68.7	0	0	27.9	0.4	0	2.5	0	0	0	99.5
8A Bosi et al. (2002) Mn discriminated	0	0	0	0.12	0	0	0	68.5	0	0	30.2	0.03	0	0.73	0	0	0	99.58
2A Bosi et al. (2002) Mn not discriminated	0	0	0	0	0	0	0	68.6102	0	0	27.9445	0.4	0	2.5	0	0	0	99.4547
8A Bosi et al. (2002) Mn not discriminated	0	0	0	0.12	0	0	0	68.4785	0	0	30.1629	0.03	0	0.73	0	0	0	99.5214
Mn80B Bosi et al. (2010) Mn discriminated	0	0	0	1.73	0	0	0	68.57	0	0	23.73	4.7	0	0	0	0	0	98.73
Mn100B Bosi et al. (2010) Mn discriminated	0	0	0	0	0	0	0	69.7	0	0	25.68	3.2	0	0	0	0	0	98.58
Mn60E Bosi et al. (2010) Mn discriminated	0	0	0	41.55	0	0	0	29.41	0	0	11.69	17.28	0	0	0	0	0	99.93
Mn100B Bosi et al. (2010) Mn not discriminated	0	0	0	0	0	0	0	69.7	0	0	25.6852	3.2	0	0	0	0	0	98.5852
Mn60E Bosi et al. (2010) Mn not discriminated	0	0	0	41.55	0	0	0	29.3971	0	0	11.7027	17.28	0	0	0	0	0	99.9299
Sample b Table 2 Antao et al. (2019)	0	0	0	0	0	0	16.55	52.37	0	0	30.66	0.15	0	0	0	0	0	99.73
S1 Table 3 Yavuz and Yavuz (2023)	0.01	0.22	0	1.02	24.99	39.98	0.577652	0	0	26.6902	2.31	0	0	3.79	0	0	0	99.5879
Guite Sample S3 Table 3 Yavuz and Yavuz (2023)	0.54	0	0	0	0	0	0	0.968136	67.7742	0	0	0	0	0	0	0.73	29.7156	99.728
N205 high Fe Gutzmer et al. (1995)	0	0	0	0	0	0	11.3	57.1	0	0	31.8	0	0	0	0	0	0	100.2
LVB404 low Fe Gutzmer et al. (1995)	0	0	0	0	0	0	1.2	65.2	0	0	33.1	0.36	0	0	0	0	0	99.86
MgMn01 Bosi et al. (2007) Mn not discriminated	0	0	0	71.1	0	0	0	0.475318	0	0	0.222863	28.1	0	0	0	0	0	99.8982
MgMn10 Bosi et al. (2007) Mn not discriminated	0	0	0	60	0	0	0	10.844	0	0	5.25525	23.5	0	0	0	0	0	99.5992
MgMn01 Bosi et al. (2007) Mn discriminated	0	0	0	71.1	0	0	0	0.43	0	0	0.26	28.1	0	0	0	0	0	99.89
MgMn10 Bosi et al. (2007) Mn discriminated	0	0	0	60	0	0	0	11.06	0	0	5.24	23.5	0	0	0	0	0	99.8
Coulsonite I Kompanchenko (2020)	0	0.29	0	0.99	32.87	32.91	0	0	0	25.69	2.34	0	0	4.48	0	0	0	99.57
Coulsonite III Kompanchenko (2020)	0.05	0.54	0	2.46	28.04	28.51	7.26288	0	0	29.2845	0.09	0	0	4.12	0	0	0	100.357
