# Supplementary material for: OxyEMG: an application for determination of the oxyspinel group end-members based on electron microprobe analyses
Source: Copernicus journal article supplement (doi:10.5194/ejm-36-87-2024), 2024-01-17
Supplement: Supplementary file 2 [file Table S2.xlsx]

## Sheet: Hoja1
Table S2 Example of output .csv cations proportions.
Sample	Si	Ti	Ge	Al	Cr	V	Fe3+	Mn3+	Co3+	Fe2+	Mn2+	Mg	Ca	Zn	Ni	Cu	Co	Total
Droop (1987) data	0	0	0	1.91899	0	0	0.0810084	0	0	0.46111	0.00244721	0.536443	0	0	0	0	0	3
Coulsonite	0	0	0	0	0	2.00009	0	0	0	0.999906	0	0	0	0	0	0	0	3
Magnesiochromite	0	0	0	0	1.99999	0	0	1.28242e-05	0	0	0	1.00001	0	0	0	0	0	3.00001
Chromite	0	0	0	0	1.99993	0	6.88051e-05	0	0	1	0	0	0	0	0	0	0	3
Zincochromite	0	0	0	0	2.00005	0	0	0	0	0	0	0	0	0.999955	0	0	0	3
Ulvöspinel	0	0.999879	0	0	0	0	0.000241311	0	0	1.99988	0	0	0	0	0	0	0	3
Spinel	0	0	0	2.00001	0	0	0	0	0	0	0	0.999986	0	0	0	0	0	3
Magnesiocoulsonite	0	0	0	0	0	2.00009	0	0	0	0	0	0.999915	0	0	0	0	0	3
Hercynite	0	0	0	1.99991	0	0	8.54223e-05	0	0	1	0	0	0	0	0	0	0	3
Gahnite	0	0	0	1.99992	0	0	0	7.63366e-05	0	0	0	0	0	1.00008	0	0	0	3.00008
Trevorite	0	0	0	0	0	0	2.00007	0	0	0	0	0	0	0	0.999925	0	0	3
Magnetite	0	0	0	0	0	0	2	0	0	0.999999	0	0	0	0	0	0	0	3
Magnesioferrite	0	0	0	0	0	0	2.0001	0	0	0	0	0.999896	0	0	0	0	0	3
Jacobsite	0	0.00243212	0	0	0	0	1.99997	0	0	0.0772339	0.424295	0.496067	0	0	0	0	0	3
Franklinite	0	0.0207962	0	0.0582013	0	0	1.89965	0	0	0.118939	0.0200771	0	0	0.882339	0	0	0	3
Manganochromite	0	0	0	0	1.84565	0.0510715	0.103282	0	0	0.191274	0.761695	0	0	0.0470305	0	0	0	3
Galaxite	0.0289231	0	0	1.6231	0	0	0.319058	0	0	0.0931474	0.868404	0.0673715	0	0	0	0	0	3
Qandilite T5 Bosi et al. (2014)	0	0.97709	0	0	0	0	0.0458198	0	0	1.03753	0	0.939559	0	0	0	0	0	3
Cuprospinel	0	0	0	0.116699	0	0	1.88282	0	0	0.0541426	0.00645134	0.102192	0	0.0196824	0	0.799696	0.0183222	3
Ringwoodite	1.02704	0	0	0	0	0	0	0	0	0.516665	0	1.4563	0	0	0	0	0	3
Ahrensite	1.01042	0	0	0	0	0	0	0	0	1.06049	0.0183918	0.910691	0	0	0	0	0	3
Brunogeierite	0	0	0.999881	0	0	0	0.000237489	0	0	1.99988	0	0	0	0	0	0	0	3
Thermaerogenite	0	0	0	1.99987	0	0	0	0.00012893	0	0	0	0	0	0	0	1.00013	0	3.00013
Cochromite de Waal (1978)	0.00394263	0.0339615	0	0.384832	1.42767	0	0.111688	0	0	0.223425	0.0255011	0.0507607	0	0.0156132	0.221093	0	0.501511	3
Vuorelainenite	0	0.00277277	0	0	0.568463	1.40125	0.0247442	0	0	0.151017	0.824481	0.00549669	0	0.0217785	0	0	0	3
Nichromite de Waal (1978)	0.00715202	0.0303879	0	0.31441	1.28813	0	0.322382	0	0	0.195586	0.00636069	0.021324	0	0	0.456129	0	0.35814	3
#5 Oktyabrsky et al. (1992)	0	0.6281	0	0.119898	0.00313998	0	0.620927	0	0	0.373517	0.0489052	1.20551	0	0	0	0	0	3
#3 Oktyabrsky et al. (1992)	0	0.473248	0	0.170727	0	0	0.882838	0	0	0.0359683	0.0680517	1.36917	0	0	0	0	0	3
FeTi30A Bosi et al. (2009)	0	0.461912	0	0	0	0	1.07618	0	0	1.46191	0	0	0	0	0	0	0	3
FeTi50Bd Bosi et al. (2009)	0	0.585463	0	0.0277911	0	0	0.801283	0	0	1.58546	0	0	0	0	0	0	0	3
RhumBAn2 Lenaz et al. (2011)	0	0.0688217	0	0.373362	0.704087	0.0228591	0.762048	0	0	0.906999	0.0113292	0.13853	0	0.00233894	0.00962485	0	0	3
SC Salamanca district. Bjerg et al. (1993)	0	0	0	0.0416877	1.74407	0	0.21848	0	0	0.492684	0	0.148853	0	0.135745	0	0	0	2.78152
LTC Las Tunas Area. Bjerg et al. (1993)	0	0	0	0.910498	1.01624	0	0.101435	0	0	0.38883	0	0.461145	0	0.0204211	0	0	0	2.89856
2A Bosi et al. (2002). Mn discriminated	0	0	0	0	0	0	0	2.00185	0	0	0.904658	0.0228279	0	0.0706612	0	0	0	3
8A Bosi et al. (2002) Mn discriminated	0	0	0	0.00540876	0	0	0.000573829	1.99402	0	0	0.978251	0.00171037	0	0.0206123	0	0	0	3.00057
2A Bosi et al. (2002) Mn not discriminated	0	0	0	0	0	0	0	2	0	0	0.906473	0.0228372	0	0.0706901	0	0	0	3
8A Bosi et al. (2002) Mn not discriminated	0	0	0	0.00541216	0	0	0	1.99459	0	0	0.977663	0.00171144	0	0.0206253	0	0	0	3
Mn80B Bosi et al. (2010) Mn discriminated	0	0	0	0.0752023	0	0	0	1.92505	0	0	0.741327	0.258425	0	0	0	0	0	3
Mn100B Bosi et al. (2010) Mn discriminated	0	0	0	0	0	0	0	2.00013	0	0	0.820022	0.179848	0	0	0	0	0	3
Mn60E Bosi et al. (2010) Mn discriminated	0	0	0	1.37276	0	0	0	0.627539	0	0	0.277565	0.722136	0	0	0	0	0	3
Mn100B Bosi et al. (2010) Mn not discriminated	0	0	0	0	0	0	0	2	0	0	0.820159	0.179841	0	0	0	0	0	3
Mn60E Bosi et al. (2010) Mn not discriminated	0	0	0	1.37276	0	0	0	0.627245	0	0	0.277866	0.722134	0	0	0	0	0	3
Sample b Table 2 Antao et al. (2019)	0	0	0	0	0	0	0.475891	1.52323	0	0	0.992337	0.00854482	0	0	0	0	0	3
S1 Table 3 Yavuz and Yavuz (2023)	0.000371746	0.00615024	0	0.0446895	0.734495	1.19161	0.0161599	0	0	0.829763	0.0727351	0	0	0.104024	0	0	0	3
Guite Sample S3 Table 3 Yavuz and Yavuz (2023)	0.0216704	0	0	0	0	0	0	0.0295719	1.97043	0	0	0	0	0	0	0.022128	0.956202	3
N205 high Fe Gutzmer et al. (1995)	0	0	0	0	0	0	0.323316	1.67668	0	0	1	0	0	0	0	0	0	3
LVB404 low Fe Gutzmer et al. (1995)	0	0	0	0	0	0	0.0342463	1.9454	0	0	1	0.0203534	0	0	0	0	0	3
MgMn01 Bosi et al. (2007) Mn not discriminated	0	0	0	1.9914	0	0	0	0.00859773	0	0	0.00448594	0.995514	0	0	0	0	0	3
MgMn10 Bosi et al. (2007) Mn not discriminated	0	0	0	1.79096	0	0	0	0.209041	0	0	0.112734	0.887266	0	0	0	0	0	3
MgMn01 Bosi et al. (2007) Mn discriminated	0	0	0	1.99145	0	0	0	0.0077784	0	0	0.0052336	0.995538	0	0	0	0	0	3
MgMn10 Bosi et al. (2007) Mn discriminated	0	0	0	1.78867	0	0	0	0.212939	0	0	0.112263	0.886131	0	0	0	0	0	3
Coulsonite I Kompanchenko (2020)	0	0.00812397	0	0.0434652	0.968108	0.982926	0	0	0	0.800327	0.0738328	0	0	0.123217	0	0	0	3
Coulsonite III Kompanchenko (2020)	0.00184146	0.0149558	0	0.106779	0.816483	0.841851	0.201292	0	0	0.901959	0.00280751	0	0	0.11203	0	0	0	3
