# Supplementary material for: OxyEMG: an application for determination of the oxyspinel group end-members based on electron microprobe analyses
Source: Copernicus journal article supplement (doi:10.5194/ejm-36-87-2024), 2024-01-17
Supplement: Supplementary file 3 [file Table S3.xlsx]

## Sheet: Hoja1
Table S3 Example of output .csv with 31 end-members.
Sample	MgAl2O4	FeAl2O4	MnAl2O4	ZnAl2O4	NiAl2O4	CuAl2O4	MgFe2O4	FeFe2O4	MnFe2O4	ZnFe2O4	NiFe2O4	CuFe2O4	FeMn2O4	MgMn2O4	MnMn2O4	ZnMn2O4	MgCr2O4	FeCr2O4	MnCr2O4	ZnCr2O4	NiCr2O4	CoCr2O4	MgV2O4	FeV2O4	MnV2O4	CoCo2O3	TiMg2O4	TiFe2O4	SiMg2O4	SiFe2O4	GeFe2O4	Sum
Droop (1987) data	4.11772	3.53946	0.0187847	0	0	0	0.173826	0.149415	0.000792978	0	0	0	0	0	0	0	0	0	0	0	0	0	0	0	0	0	0	0	0	0	0	8
Coulsonite	0	0	0	0	0	0	0	0	0	0	0	0	0	0	0	0	0	0	0	0	0	0	0	8	0	0	0	0	0	0	0	8
Magnesiochromite	0	0	0	0	0	0	0	0	0	0	0	0	0	5.12967e-05	0	0	7.99995	0	0	0	0	0	0	0	0	0	0	0	0	0	0	8
Chromite	0	0	0	0	0	0	0	0.000275221	0	0	0	0	0	0	0	0	0	7.99972	0	0	0	0	0	0	0	0	0	0	0	0	0	8
Zincochromite	0	0	0	0	0	0	0	0	0	0	0	0	0	0	0	0	0	0	0	8	0	0	0	0	0	0	0	0	0	0	0	8
Ulvöspinel	0	0	0	0	0	0	0	0.00193025	0	0	0	0	0	0	0	0	0	0	0	0	0	0	0	0	0	0	0	7.99807	0	0	0	8
Spinel	8	0	0	0	0	0	0	0	0	0	0	0	0	0	0	0	0	0	0	0	0	0	0	0	0	0	0	0	0	0	0	8
Magnesiocoulsonite	0	0	0	0	0	0	0	0	0	0	0	0	0	0	0	0	0	0	0	0	0	0	8	0	0	0	0	0	0	0	0	8
Hercynite	0	7.99966	0	0	0	0	0	0.000341689	0	0	0	0	0	0	0	0	0	0	0	0	0	0	0	0	0	0	0	0	0	0	0	8
Gahnite	0	0	0	7.99969	0	0	0	0	0	0	0	0	0	0	0	0.000305346	0	0	0	0	0	0	0	0	0	0	0	0	0	0	0	8
Trevorite	0	0	0	0	0	0	0	0	0	0	8	0	0	0	0	0	0	0	0	0	0	0	0	0	0	0	0	0	0	0	0	8
Magnetite	0	0	0	0	0	0	0	8	0	0	0	0	0	0	0	0	0	0	0	0	0	0	0	0	0	0	0	0	0	0	0	8
Magnesioferrite	0	0	0	0	0	0	8	0	0	0	0	0	0	0	0	0	0	0	0	0	0	0	0	0	0	0	0	0	0	0	0	8
Jacobsite	0	0	0	0	0	0	3.97532	0.618928	3.40016	0	0	0	0	0	0	0	0	0	0	0	0	0	0	0	0	0	0.00483429	0.000752663	0	0	0	8
Franklinite	0	0.02766	0.00466908	0.205194	0	0	0	0.902803	0.152395	6.6974	0	0	0	0	0	0	0	0	0	0	0	0	0	0	0	0	0	0.00988336	0	0	0	8
Manganochromite	0	0	0	0	0	0	0	0.0791156	0.315055	0.0194529	0	0	0	0	0	0	0	1.4138	5.63004	0.347624	0	0	0	0.0391217	0.155791	0	0	0	0	0	0	8
Galaxite	0.436753	0.603852	5.62965	0	0	0	0.0858541	0.118701	1.10664	0	0	0	0	0	0	0	0	0	0	0	0	0	0	0	0	0	0	0	0.00778282	0.0107605	0	8
Qandilite T5 Bosi et al. (2014)	0	0	0	0	0	0	0.170296	0.188053	0	0	0	0	0	0	0	0	0	0	0	0	0	0	0	0	0	0	3.63149	4.01016	0	0	0	8
Cuprospinel	0.0485808	0.0257387	0.00306689	0.00935678	0	0.380165	0.783802	0.415268	0.0494811	0.150962	0	6.13358	0	0	0	0	0	0	0	0	0	0	0	0	0	0	0	0	0	0	0	8
Ringwoodite	0	0	0	0	0	0	0	0	0	0	0	0	0	0	0	0	0	0	0	0	0	0	0	0	0	0	0	0	5.90502	2.09498	0	8
Ahrensite	0	0	0	0	0	0	0	0	0	0	0	0	0	0	0	0	0	0	0	0	0	0	0	0	0	0	0	0	3.69601	4.30399	0	8
Brunogeierite	0	0	0	0	0	0	0	0.00189968	0	0	0	0	0	0	0	0	0	0	0	0	0	0	0	0	0	0	0	0	0	0	7.9981	8
Thermaerogenite	0	0	0	0	0	8	0	0	0	0	0	0	0	0	0	0	0	0	0	0	0	0	0	0	0	0	0	0	0	0	0	8
Cochromite de Waal (1978)	0.0888677	0.391155	0.0446452	0.0273343	0.387071	0	0.0257917	0.113523	0.0129572	0.00793312	0.112338	0	0	0	0	0	0.329687	1.45113	0.165628	0.101407	1.43598	3.25727	0	0	0	0	0.0078426	0.0345195	0.000910457	0.00400741	0	8
Vuorelainenite	0	0	0	0	0	0	0.000552358	0.0151755	0.0828514	0.0021885	0	0	0	0	0	0	0.0126896	0.348636	1.90339	0.0502776	0	0	0.0312796	0.859379	4.69182	0	6.18957e-05	0.00170053	0	0	0	8
Nichromite de Waal (1978)	0.0301789	0.276804	0.00900199	0	0.645539	0	0.0309441	0.283822	0.00923023	0	0.661906	0	0	0	0	0	0.123642	1.13406	0.0368809	0	2.64475	2.07659	0	0	0	0	0.00291681	0.0267532	0.000686493	0.00629658	0	8
#5 Oktyabrsky et al. (1992)	0.524898	0.162635	0.021294	0	0	0	2.71834	0.842255	0.110278	0	0	0	0	0	0	0	0.0137465	0.00425922	0.000557667	0	0	0	0	0	0	0	2.74975	0.851985	0	0	0	8
#3 Oktyabrsky et al. (1992)	0.843467	0.022158	0.0419228	0	0	0	4.36161	0.11458	0.216785	0	0	0	0	0	0	0	0	0	0	0	0	0	0	0	0	0	2.33805	0.0614211	0	0	0	8
FeTi30A Bosi et al. (2009)	0	0	0	0	0	0	0	5.59748	0	0	0	0	0	0	0	0	0	0	0	0	0	0	0	0	0	0	0	2.40252	0	0	0	8
FeTi50Bd Bosi et al. (2009)	0	0.157174	0	0	0	0	0	4.5317	0	0	0	0	0	0	0	0	0	0	0	0	0	0	0	0	0	0	0	3.31112	0	0	0	8
RhumBAn2 Lenaz et al. (2011)	0.200647	1.3137	0.0164092	0.00338771	0.0139406	0	0.409528	2.68131	0.0334918	0.00691445	0.0284534	0	0	0	0	0	0.378379	2.47737	0.0309444	0.00638854	0.0262892	0	0.0122846	0.0804311	0.00100465	0	0.0369851	0.242153	0	0	0	8
SC Salamanca district. Bjerg et al. (1993)	0.031866	0.105472	0	0.02906	0	0	0.167006	0.552768	0	0.1523	0	0	0	0	0	0	1.33316	4.4126	0	1.21577	0	0	0	0	0	0	0	0	0	0	0	8
LTC Las Tunas Area. Bjerg et al. (1993)	1.90277	1.60438	0	0.0842612	0	0	0.21198	0.178738	0	0.00938721	0	0	0	0	0	0	2.12374	1.7907	0	0.0940466	0	0	0	0	0	0	0	0	0	0	0	8
2A Bosi et al. (2002). Mn discriminated	0	0	0	0	0	0	0	0	0	0	0	0	0	0.182962	7.2507	0.566339	0	0	0	0	0	0	0	0	0	0	0	0	0	0	0	8
8A Bosi et al. (2002) Mn discriminated	3.69826e-05	0	0.0211524	0.000445692	0	0	3.92358e-06	0	0.00224411	4.72846e-05	0	0	0	0.0136342	7.79812	0.164311	0	0	0	0	0	0	0	0	0	0	0	0	0	0	0	8
2A Bosi et al. (2002) Mn not discriminated	0	0	0	0	0	0	0	0	0	0	0	0	0	0.182698	7.25178	0.565521	0	0	0	0	0	0	0	0	0	0	0	0	0	0	0	8
8A Bosi et al. (2002) Mn not discriminated	3.70504e-05	0	0.0211651	0.000446509	0	0	0	0	0	0	0	0	0	0.0136545	7.80014	0.164556	0	0	0	0	0	0	0	0	0	0	0	0	0	0	0	8
Mn80B Bosi et al. (2010) Mn discriminated	0.0777463	0	0.223026	0	0	0	0	0	0	0	0	0	0	1.99017	5.70906	0	0	0	0	0	0	0	0	0	0	0	0	0	0	0	0	8
Mn100B Bosi et al. (2010) Mn discriminated	0	0	0	0	0	0	0	0	0	0	0	0	0	1.43897	6.56103	0	0	0	0	0	0	0	0	0	0	0	0	0	0	0	0	8
Mn60E Bosi et al. (2010) Mn discriminated	3.96587	0	1.52435	0	0	0	0	0	0	0	0	0	0	1.81294	0.696836	0	0	0	0	0	0	0	0	0	0	0	0	0	0	0	0	8
Mn100B Bosi et al. (2010) Mn not discriminated	0	0	0	0	0	0	0	0	0	0	0	0	0	1.43873	6.56127	0	0	0	0	0	0	0	0	0	0	0	0	0	0	0	0	8
Mn60E Bosi et al. (2010) Mn not discriminated	3.96525	0	1.52577	0	0	0	0	0	0	0	0	0	0	1.81182	0.697161	0	0	0	0	0	0	0	0	0	0	0	0	0	0	0	0	8
Sample b Table 2 Antao et al. (2019)	0	0	0	0	0	0	0.0162585	0	1.88815	0	0	0	0	0.0520399	6.04356	0	0	0	0	0	0	0	0	0	0	0	0	0	0	0	0	8
S1 Table 3 Yavuz and Yavuz (2023)	0	0.157679	0.0138218	0.0197675	0	0	0	0.0570174	0.00499801	0.007148	0	0	0	0	0	0	0	2.59155	0.227169	0.32489	0	0	0	4.2044	0.368548	0	0	0.0217001	0	0.00131164	0	8
Guite Sample S3 Table 3 Yavuz and Yavuz (2023)	0	0	0	0	0	0	0	0	0	0	0	0	0	0	0	0	0	0	0	0	0	0	0	0	0	8	0	0	0	0	0	8
N205 high Fe Gutzmer et al. (1995)	0	0	0	0	0	0	0	0	1.29326	0	0	0	0	0	6.70674	0	0	0	0	0	0	0	0	0	0	0	0	0	0	0	0	8
LVB404 low Fe Gutzmer et al. (1995)	0	0	0	0	0	0	0.0027606	0	0.135633	0	0	0	0	0.156819	7.70479	0	0	0	0	0	0	0	0	0	0	0	0	0	0	0	0	8
MgMn01 Bosi et al. (2007) Mn not discriminated	7.92988	0	0.0357333	0	0	0	0	0	0	0	0	0	0	0.0342367	0.000154276	0	0	0	0	0	0	0	0	0	0	0	0	0	0	0	0	8
MgMn10 Bosi et al. (2007) Mn not discriminated	6.35623	0	0.807607	0	0	0	0	0	0	0	0	0	0	0.741901	0.0942642	0	0	0	0	0	0	0	0	0	0	0	0	0	0	0	0	8
MgMn01 Bosi et al. (2007) Mn discriminated	7.9272	0	0.0416737	0	0	0	0	0	0	0	0	0	0	0.0309628	0.000162773	0	0	0	0	0	0	0	0	0	0	0	0	0	0	0	0	8
MgMn10 Bosi et al. (2007) Mn discriminated	6.34508	0	0.803851	0	0	0	0	0	0	0	0	0	0	0.755375	0.0956977	0	0	0	0	0	0	0	0	0	0	0	0	0	0	0	0	8
Coulsonite I Kompanchenko (2020)	0	0.148449	0.0136949	0.022855	0	0	0	0	0	0	0	0	0	0	0	0	0	3.30643	0.305029	0.509054	0	0	0	3.35704	0.309698	0	0	0.0277462	0	0	0	8
Coulsonite III Kompanchenko (2020)	0	0.401237	0.00124892	0.0498368	0	0	0	0.75638	0.00235437	0.0939484	0	0	0	0	0	0	0	3.06804	0.00954982	0.381075	0	0	0	3.16337	0.00984654	0	0	0.0561983	0	0.00691953	0	8
