# Supplementary material for: OxyEMG: an application for determination of the oxyspinel group end-members based on electron microprobe analyses
Source: Copernicus journal article supplement (doi:10.5194/ejm-36-87-2024), 2024-01-17
Supplement: Supplementary file 4 [file Table S4.xlsx]

## Sheet: Hoja1
Table S4 Example of output .csv with R3+ and R2+ values and R3+/ R2+ ratio.
Sample	Sum R3+	Sum R2+	Sum R3+/SumR2+
Droop (1987) data	2	0.997553	2.00491
Coulsonite	0	0.999906	0
Magnesiochromite	1.99999	1.00001	1.99996
Chromite	2	1	2
Zincochromite	2.00005	0	0
Ulvöspinel	0.000241311	1.99988	0.000120663
Spinel	2.00001	0.999986	2.00004
Magnesiocoulsonite	0	0.999915	0
Hercynite	2	1	2
Gahnite	1.99992	0	0
Trevorite	2.00007	0	0
Magnetite	2	0.999999	2
Magnesioferrite	2.0001	0.999896	2.00031
Jacobsite	1.99997	0.573301	3.48852
Franklinite	1.95785	0.118939	16.461
Manganochromite	1.94893	0.191274	10.1892
Galaxite	1.94215	0.160519	12.0992
Qandilite T5 Bosi et al. (2014)	0.0458198	1.97709	0.0231754
Cuprospinel	1.99951	0.156335	12.79
Ringwoodite	0	1.97296	0
Ahrensite	0	1.97118	0
Brunogeierite	0.000237489	1.99988	0.000118751
Thermaerogenite	1.99987	0	0
Cochromite de Waal (1978)	1.92419	0.274186	7.01784
Vuorelainenite	0.593207	0.156513	3.79014
Nichromite de Waal (1978)	1.92492	0.21691	8.87427
#5 Oktyabrsky et al. (1992)	0.743964	1.57903	0.471153
#3 Oktyabrsky et al. (1992)	1.05356	1.40514	0.749795
FeTi30A Bosi et al. (2009)	1.07618	1.46191	0.736143
FeTi50Bd Bosi et al. (2009)	0.829074	1.58546	0.522922
RhumBAn2 Lenaz et al. (2011)	1.8395	1.04553	1.75939
SC Salamanca district. Bjerg et al. (1993)	2.00424	0.641537	3.12412
LTC Las Tunas Area. Bjerg et al. (1993)	2.02817	0.849975	2.38615
2A Bosi et al. (2002). Mn discriminated	0	0.0228279	0
8A Bosi et al. (2002) Mn discriminated	0.00598259	0.00171037	3.49784
2A Bosi et al. (2002) Mn not discriminated	0	0.0228372	0
8A Bosi et al. (2002) Mn not discriminated	0.00541216	0.00171144	3.16234
Mn80B Bosi et al. (2010) Mn discriminated	0.0752023	0.258425	0.291002
Mn100B Bosi et al. (2010) Mn discriminated	0	0.179848	0
Mn60E Bosi et al. (2010) Mn discriminated	1.37276	0.722136	1.90097
Mn100B Bosi et al. (2010) Mn not discriminated	0	0.179841	0
Mn60E Bosi et al. (2010) Mn not discriminated	1.37276	0.722134	1.90097
Sample b Table 2 Antao et al. (2019)	0.475891	0.00854482	55.6935
S1 Table 3 Yavuz and Yavuz (2023)	0.795345	0.829763	0.95852
Guite Sample S3 Table 3 Yavuz and Yavuz (2023)	0	0	0
N205 high Fe Gutzmer et al. (1995)	0.323316	0	0
LVB404 low Fe Gutzmer et al. (1995)	0.0342463	0.0203534	1.68258
MgMn01 Bosi et al. (2007) Mn not discriminated	1.9914	0.995514	2.00038
MgMn10 Bosi et al. (2007) Mn not discriminated	1.79096	0.887266	2.01851
MgMn01 Bosi et al. (2007) Mn discriminated	1.99145	0.995538	2.00038
MgMn10 Bosi et al. (2007) Mn discriminated	1.78867	0.886131	2.01851
Coulsonite I Kompanchenko (2020)	1.01157	0.800327	1.26395
Coulsonite III Kompanchenko (2020)	1.12455	0.901959	1.24679
