# Supplementary material for: OxyEMG: an application for determination of the oxyspinel group end-members based on electron microprobe analyses
Source: Copernicus journal article supplement (doi:10.5194/ejm-36-87-2024), 2024-01-17
Supplement: Supplementary file 5 [file Table S5.xlsx]

## Sheet: Hoja1
Table S5 Example of output .csv with redistribution proportions for the corresponding prisms end-members.
Sample	Mag Prism								Ulv Prims
	MgAl2O4	FeAl2O4	MgFe2O4	FeFe2O4	MgCr2O4	FeCr2O4	Total		MgAl2O4	FeAl2O4	TiMg2O4	TiFe2O4	MgCr2O4	FeCr2O4	Total
Droop (1987) data	0.515978	0.443518	0.0217815	0.0187227	0	0	1		0	0	0	0	0	0	0
Coulsonite	0	0	0	0	0	0	0		0	0	0	0	0	0	0
Magnesiochromite	0	0	0	0	1	0	1		0	0	0	0	0	0	0
Chromite	0	0	0	3.44026e-05	0	0.999966	1		0	0	0	0	0	0	0
Zincochromite	0	0	0	0	0	0	0		0	0	0	0	0	0	0
Ulvöspinel	0	0	0	0	0	0	0		0	0	0	1	0	0	1
Spinel	1	0	0	0	0	0	1		0	0	0	0	0	0	0
Magnesiocoulsonite	0	0	0	0	0	0	0		0	0	0	0	0	0	0
Hercynite	0	0.999957	0	4.27112e-05	0	0	1		0	0	0	0	0	0	0
Gahnite	0	0	0	0	0	0	0		0	0	0	0	0	0	0
Trevorite	0	0	0	0	0	0	0		0	0	0	0	0	0	0
Magnetite	0	0	0	1	0	0	1		0	0	0	0	0	0	0
Magnesioferrite	0	0	1	0	0	0	1		0	0	0	0	0	0	0
Jacobsite	0	0	0	0	0	0	0		0	0	0	0	0	0	0
Franklinite	0	0	0	0	0	0	0		0	0	0	0	0	0	0
Manganochromite	0	0	0	0	0	0	0		0	0	0	0	0	0	0
Galaxite	0	0	0	0	0	0	0		0	0	0	0	0	0	0
Qandilite T5 Bosi et al. (2014)	0	0	0	0	0	0	0		0	0	0.475223	0.524777	0	0	1
Cuprospinel	0	0	0	0	0	0	0		0	0	0	0	0	0	0
Ringwoodite	0	0	0	0	0	0	0		0	0	0	0	0	0	0
Ahrensite	0	0	0	0	0	0	0		0	0	0	0	0	0	0
Brunogeierite	0	0	0	0	0	0	0		0	0	0	0	0	0	0
Thermaerogenite	0	0	0	0	0	0	0		0	0	0	0	0	0	0
Cochromite de Waal (1978)	0	0	0	0	0	0	0		0	0	0	0	0	0	0
Vuorelainenite	0	0	0	0	0	0	0		0	0	0	0	0	0	0
Nichromite de Waal (1978)	0	0	0	0	0	0	0		0	0	0	0	0	0	0
#5 Oktyabrsky et al. (1992)	0	0	0	0	0	0	0		0.121863	0.0377582	0.638397	0.197802	0.00319146	0.000988845	1
#3 Oktyabrsky et al. (1992)	0.157899	0.00414803	0.816503	0.0214497	0	0	1		0	0	0	0	0	0	0
FeTi30A Bosi et al. (2009)	0	0	0	1	0	0	1		0	0	0	0	0	0	0
FeTi50Bd Bosi et al. (2009)	0	0	0	0	0	0	0		0	0.0453174	0	0.954683	0	0	1
RhumBAn2 Lenaz et al. (2011)	0.026893	0.176077	0.0548897	0.35938	0.0507148	0.332046	1		0	0	0	0	0	0	0
SC Salamanca district. Bjerg et al. (1993)	0	0	0	0	0	0	0		0	0	0	0	0	0	0
LTC Las Tunas Area. Bjerg et al. (1993)	0	0	0	0	0	0	0		0	0	0	0	0	0	0
2A Bosi et al. (2002). Mn discriminated	0	0	0	0	0	0	0		0	0	0	0	0	0	0
8A Bosi et al. (2002) Mn discriminated	0	0	0	0	0	0	0		0	0	0	0	0	0	0
2A Bosi et al. (2002) Mn not discriminated	0	0	0	0	0	0	0		0	0	0	0	0	0	0
8A Bosi et al. (2002) Mn not discriminated	0	0	0	0	0	0	0		0	0	0	0	0	0	0
Mn80B Bosi et al. (2010) Mn discriminated	0	0	0	0	0	0	0		0	0	0	0	0	0	0
Mn100B Bosi et al. (2010) Mn discriminated	0	0	0	0	0	0	0		0	0	0	0	0	0	0
Mn60E Bosi et al. (2010) Mn discriminated	1	0	0	0	0	0	1		0	0	0	0	0	0	0
Mn100B Bosi et al. (2010) Mn not discriminated	0	0	0	0	0	0	0		0	0	0	0	0	0	0
Mn60E Bosi et al. (2010) Mn not discriminated	1	0	0	0	0	0	1		0	0	0	0	0	0	0
Sample b Table 2 Antao et al. (2019)	0	0	0	0	0	0	0		0	0	0	0	0	0	0
S1 Table 3 Yavuz and Yavuz (2023)	0	0	0	0	0	0	0		0	0	0	0	0	0	0
Guite Sample S3 Table 3 Yavuz and Yavuz (2023)	0	0	0	0	0	0	0		0	0	0	0	0	0	0
N205 high Fe Gutzmer et al. (1995)	0	0	0	0	0	0	0		0	0	0	0	0	0	0
LVB404 low Fe Gutzmer et al. (1995)	0	0	0	0	0	0	0		0	0	0	0	0	0	0
MgMn01 Bosi et al. (2007) Mn not discriminated	1	0	0	0	0	0	1		0	0	0	0	0	0	0
MgMn10 Bosi et al. (2007) Mn not discriminated	1	0	0	0	0	0	1		0	0	0	0	0	0	0
MgMn01 Bosi et al. (2007) Mn discriminated	1	0	0	0	0	0	1		0	0	0	0	0	0	0
MgMn10 Bosi et al. (2007) Mn discriminated	1	0	0	0	0	0	1		0	0	0	0	0	0	0
Coulsonite I Kompanchenko (2020)	0	0.0429679	0	0	0	0.957032	1		0	0	0	0	0	0	0
Coulsonite III Kompanchenko (2020)	0	0.0949525	0	0.178997	0	0.726051	1		0	0	0	0	0	0	0
