# Supplementary material for: OxyEMG: an application for determination of the oxyspinel group end-members based on electron microprobe analyses
Source: Copernicus journal article supplement (doi:10.5194/ejm-36-87-2024), 2024-01-17
Supplement: Supplementary file 6 [file Table S6.xlsx]

## Sheet: Hoja1
Table S6 Example of output .csv data validation.
Sample	FeAl2O4/MgAl2O4	FeFe2O4/MgFe2O4	FeCr2O4/MgCr2O4	FeV2O4/MgV2O4	SiFe2O4/SiMg2O4	TiFe2O4/TiMg2O4	FeMn2O4/MgMn2O4		MnAl2O4/FeAl2O4	MnFe2O4/FeFe2O4	MnCr2O4/FeCr2O4	MnV2O4/FeV2O4	MnMn2O4/FeMn2O4		MnAl2O4/MgAl2O4	MnFe2O4/MgFe2O4	MnCr2O4/MgCr2O4	MnV2O4/MgV2O4	MnMn2O4/MgMn2O4		MgCr2O4/MgAl2O4	FeCr2O4/FeAl2O4	MnCr2O4/MnAl2O4	ZnCr2O4/ZnAl2O4	NiCr2O4/NiAl2O4		MgFe2O4/MgAl2O4	FeFe2O4/FeAl2O4	MnFe2O4/MnAl2O4	ZnFe2O4/ZnAl2O4	NiFe2O4/NiAl2O4	CuFe2O4/CuAl2O4		MgFe2O4/MgCr2O4	FeFe2O4/FeCr2O4	MnFe2O4/MnCr2O4	ZnFe2O4/ZnCr2O4	NiFe2O4/NiCr2O4		TiMg2O4/MgAl2O4	TiFe2O4/FeAl2O4		TiMg2O4/MgCr2O4	TiFe2O4/FeCr2O4		MgV2O4/MgAl2O4	FeV2O4/FeAl2O4	MnV2O4/MnAl2O4
Droop (1987) data	0.859569	0.859569	0	0	0	0	0		0.00530722	0.00530722	0	0	0		0.00456192	0.00456192	0	0	0		0	0	0	0	0		0.042214	0.042214	0.042214	0	0	0		0	0	0	0	0		0	0		0	0		0	0	0
Coulsonite	0	0	0	0	0	0	0		0	0	0	0	0		0	0	0	0	0		0	0	0	0	0		0	0	0	0	0	0		0	0	0	0	0		0	0		0	0		0	0	0
Magnesiochromite	0	0	0	0	0	0	0		0	0	0	0	0		0	0	0	0	0		0	0	0	0	0		0	0	0	0	0	0		0	0	0	0	0		0	0		0	0		0	0	0
Chromite	0	0	0	0	0	0	0		0	0	0	0	0		0	0	0	0	0		0	0	0	0	0		0	0	0	0	0	0		0	3.44038e-05	0	0	0		0	0		0	0		0	0	0
Zincochromite	0	0	0	0	0	0	0		0	0	0	0	0		0	0	0	0	0		0	0	0	0	0		0	0	0	0	0	0		0	0	0	0	0		0	0		0	0		0	0	0
Ulvöspinel	0	0	0	0	0	0	0		0	0	0	0	0		0	0	0	0	0		0	0	0	0	0		0	0	0	0	0	0		0	0	0	0	0		0	0		0	0		0	0	0
Spinel	0	0	0	0	0	0	0		0	0	0	0	0		0	0	0	0	0		0	0	0	0	0		0	0	0	0	0	0		0	0	0	0	0		0	0		0	0		0	0	0
Magnesiocoulsonite	0	0	0	0	0	0	0		0	0	0	0	0		0	0	0	0	0		0	0	0	0	0		0	0	0	0	0	0		0	0	0	0	0		0	0		0	0		0	0	0
Hercynite	0	0	0	0	0	0	0		0	0	0	0	0		0	0	0	0	0		0	0	0	0	0		0	4.2713e-05	0	0	0	0		0	0	0	0	0		0	0		0	0		0	0	0
Gahnite	0	0	0	0	0	0	0		0	0	0	0	0		0	0	0	0	0		0	0	0	0	0		0	0	0	0	0	0		0	0	0	0	0		0	0		0	0		0	0	0
Trevorite	0	0	0	0	0	0	0		0	0	0	0	0		0	0	0	0	0		0	0	0	0	0		0	0	0	0	0	0		0	0	0	0	0		0	0		0	0		0	0	0
Magnetite	0	0	0	0	0	0	0		0	0	0	0	0		0	0	0	0	0		0	0	0	0	0		0	0	0	0	0	0		0	0	0	0	0		0	0		0	0		0	0	0
Magnesioferrite	0	0	0	0	0	0	0		0	0	0	0	0		0	0	0	0	0		0	0	0	0	0		0	0	0	0	0	0		0	0	0	0	0		0	0		0	0		0	0	0
Jacobsite	0	0.155693	0	0	0	0.155693	0		0	5.49363	0	0	0		0	0.855317	0	0	0		0	0	0	0	0		0	0	0	0	0	0		0	0	0	0	0		0	0		0	0		0	0	0
Franklinite	0	0	0	0	0	0	0		0.168802	0.168802	0	0	0		0	0	0	0	0		0	0	0	0	0		0	32.6393	32.6393	32.6393	0	0		0	0	0	0	0		0	0.357316		0	0		0	0	0
Manganochromite	0	0	0	0	0	0	0		0	3.98221	3.98221	3.98221	0		0	0	0	0	0		0	0	0	0	0		0	0	0	0	0	0		0	0.0559596	0.0559596	0.0559596	0		0	0		0	0		0	0	0
Galaxite	1.38259	1.38259	0	0	1.38259	0	0		9.3229	9.3229	0	0	0		12.8898	12.8898	0	0	0		0	0	0	0	0		0.196574	0.196574	0.196574	0	0	0		0	0	0	0	0		0	0		0	0		0	0	0
Qandilite T5 Bosi et al. (2014)	0	1.10427	0	0	0	1.10427	0		0	0	0	0	0		0	0	0	0	0		0	0	0	0	0		0	0	0	0	0	0		0	0	0	0	0		0	0		0	0		0	0	0
Cuprospinel	0.529812	0.529812	0	0	0	0	0		0.119155	0.119155	0	0	0		0.0631296	0.0631296	0	0	0		0	0	0	0	0		16.134	16.134	16.134	16.134	0	16.134		0	0	0	0	0		0	0		0	0		0	0	0
Ringwoodite	0	0	0	0	0.35478	0	0		0	0	0	0	0		0	0	0	0	0		0	0	0	0	0		0	0	0	0	0	0		0	0	0	0	0		0	0		0	0		0	0	0
Ahrensite	0	0	0	0	1.16449	0	0		0	0	0	0	0		0	0	0	0	0		0	0	0	0	0		0	0	0	0	0	0		0	0	0	0	0		0	0		0	0		0	0	0
Brunogeierite	0	0	0	0	0	0	0		0	0	0	0	0		0	0	0	0	0		0	0	0	0	0		0	0	0	0	0	0		0	0	0	0	0		0	0		0	0		0	0	0
Thermaerogenite	0	0	0	0	0	0	0		0	0	0	0	0		0	0	0	0	0		0	0	0	0	0		0	0	0	0	0	0		0	0	0	0	0		0	0		0	0		0	0	0
Cochromite de Waal (1978)	4.40154	4.40154	4.40154	0	4.40154	4.40154	0		0.114137	0.114137	0.114137	0	0		0.502378	0.502378	0.502378	0	0		3.70986	3.70986	3.70986	3.70986	3.70986		0.290226	0.290226	0.290226	0.290226	0.290226	0		0.0782309	0.0782309	0.0782309	0.0782309	0.0782309		0.0882503	0.0882503		0.023788	0.023788		0	0	0
Vuorelainenite	0	27.4741	27.4741	27.4741	0	27.4741	0		0	5.45954	5.45954	5.45954	0		0	149.996	149.996	149.996	0		0	0	0	0	0		0	0	0	0	0	0		0.0435283	0.0435283	0.0435283	0.0435283	0		0	0		0.00487766	0.00487766		0	0	0
Nichromite de Waal (1978)	9.1721	9.1721	9.1721	0	9.1721	9.1721	0		0.0325212	0.0325212	0.0325212	0	0		0.298287	0.298287	0.298287	0	0		4.09697	4.09697	4.09697	0	4.09697		1.02535	1.02535	1.02535	0	1.02535	0		0.250271	0.250271	0.250271	0	0.250271		0.0966504	0.0966504		0.0235907	0.0235907		0	0	0
#5 Oktyabrsky et al. (1992)	0.309841	0.309841	0.309841	0	0	0.309841	0		0.130932	0.130932	0.130932	0	0		0.040568	0.040568	0.040568	0	0		0.0261889	0.0261889	0.0261889	0	0		5.17881	5.17881	5.17881	0	0	0		197.748	197.748	197.748	0	0		5.23864	5.23864		200.033	200.033		0	0	0
#3 Oktyabrsky et al. (1992)	0.0262702	0.0262702	0	0	0	0.0262702	0		1.89199	1.89199	0	0	0		0.049703	0.049703	0	0	0		0	0	0	0	0		5.17105	5.17105	5.17105	0	0	0		0	0	0	0	0		2.77196	2.77196		0	0		0	0	0
FeTi30A Bosi et al. (2009)	0	0	0	0	0	0	0		0	0	0	0	0		0	0	0	0	0		0	0	0	0	0		0	0	0	0	0	0		0	0	0	0	0		0	0		0	0		0	0	0
FeTi50Bd Bosi et al. (2009)	0	0	0	0	0	0	0		0	0	0	0	0		0	0	0	0	0		0	0	0	0	0		0	28.8323	0	0	0	0		0	0	0	0	0		0	21.0666		0	0		0	0	0
RhumBAn2 Lenaz et al. (2011)	6.54731	6.54731	6.54731	6.54731	0	6.54731	0		0.0124909	0.0124909	0.0124909	0.0124909	0		0.0817815	0.0817815	0.0817815	0.0817815	0		1.8858	1.8858	1.8858	1.8858	1.8858		2.04104	2.04104	2.04104	2.04104	2.04104	0		1.08232	1.08232	1.08232	1.08232	1.08232		0.184329	0.184329		0.097746	0.097746		0.0612251	0.0612251	0.0612251
SC Salamanca district. Bjerg et al. (1993)	3.30987	3.30987	3.30987	0	0	0	0		0	0	0	0	0		0	0	0	0	0		41.8365	41.8365	0	41.8365	0		5.24088	5.24088	0	5.24088	0	0		0.12527	0.12527	0	0.12527	0		0	0		0	0		0	0	0
LTC Las Tunas Area. Bjerg et al. (1993)	0.843184	0.843184	0.843184	0	0	0	0		0	0	0	0	0		0	0	0	0	0		1.11613	1.11613	0	1.11613	0		0.111406	0.111406	0	0.111406	0	0		0.0998145	0.0998145	0	0.0998145	0		0	0		0	0		0	0	0
2A Bosi et al. (2002). Mn discriminated	0	0	0	0	0	0	0		0	0	0	0	0		0	0	0	0	39.6296		0	0	0	0	0		0	0	0	0	0	0		0	0	0	0	0		0	0		0	0		0	0	0
8A Bosi et al. (2002) Mn discriminated	0	0	0	0	0	0	0		0	0	0	0	0		571.954	571.954	0	0	571.954		0	0	0	0	0		0.106093	0	0.106093	0.106093	0	0		0	0	0	0	0		0	0		0	0		0	0	0
2A Bosi et al. (2002) Mn not discriminated	0	0	0	0	0	0	0		0	0	0	0	0		0	0	0	0	39.6928		0	0	0	0	0		0	0	0	0	0	0		0	0	0	0	0		0	0		0	0		0	0	0
8A Bosi et al. (2002) Mn not discriminated	0	0	0	0	0	0	0		0	0	0	0	0		571.251	0	0	0	571.251		0	0	0	0	0		0	0	0	0	0	0		0	0	0	0	0		0	0		0	0		0	0	0
Mn80B Bosi et al. (2010) Mn discriminated	0	0	0	0	0	0	0		0	0	0	0	0		2.86863	0	0	0	2.86863		0	0	0	0	0		0	0	0	0	0	0		0	0	0	0	0		0	0		0	0		0	0	0
Mn100B Bosi et al. (2010) Mn discriminated	0	0	0	0	0	0	0		0	0	0	0	0		0	0	0	0	4.55953		0	0	0	0	0		0	0	0	0	0	0		0	0	0	0	0		0	0		0	0		0	0	0
Mn60E Bosi et al. (2010) Mn discriminated	0	0	0	0	0	0	0		0	0	0	0	0		0.384367	0	0	0	0.384367		0	0	0	0	0		0	0	0	0	0	0		0	0	0	0	0		0	0		0	0		0	0	0
Mn100B Bosi et al. (2010) Mn not discriminated	0	0	0	0	0	0	0		0	0	0	0	0		0	0	0	0	4.56046		0	0	0	0	0		0	0	0	0	0	0		0	0	0	0	0		0	0		0	0		0	0	0
Mn60E Bosi et al. (2010) Mn not discriminated	0	0	0	0	0	0	0		0	0	0	0	0		0.384785	0	0	0	0.384785		0	0	0	0	0		0	0	0	0	0	0		0	0	0	0	0		0	0		0	0		0	0	0
Sample b Table 2 Antao et al. (2019)	0	0	0	0	0	0	0		0	0	0	0	0		0	116.133	0	0	116.133		0	0	0	0	0		0	0	0	0	0	0		0	0	0	0	0		0	0		0	0		0	0	0
S1 Table 3 Yavuz and Yavuz (2023)	0	0	0	0	0	0	0		0.0876577	0.0876577	0.0876577	0.0876577	0		0	0	0	0	0		0	16.4355	16.4355	16.4355	0		0	0.361603	0.361603	0.361603	0	0		0	0.0220013	0.0220013	0.0220013	0		0	0.137622		0	0.00837342		0	26.6642	26.6642
Guite Sample S3 Table 3 Yavuz and Yavuz (2023)	0	0	0	0	0	0	0		0	0	0	0	0		0	0	0	0	0		0	0	0	0	0		0	0	0	0	0	0		0	0	0	0	0		0	0		0	0		0	0	0
N205 high Fe Gutzmer et al. (1995)	0	0	0	0	0	0	0		0	0	0	0	0		0	0	0	0	0		0	0	0	0	0		0	0	0	0	0	0		0	0	0	0	0		0	0		0	0		0	0	0
LVB404 low Fe Gutzmer et al. (1995)	0	0	0	0	0	0	0		0	0	0	0	0		0	49.1318	0	0	49.1318		0	0	0	0	0		0	0	0	0	0	0		0	0	0	0	0		0	0		0	0		0	0	0
MgMn01 Bosi et al. (2007) Mn not discriminated	0	0	0	0	0	0	0		0	0	0	0	0		0.00450616	0	0	0	0.00450616		0	0	0	0	0		0	0	0	0	0	0		0	0	0	0	0		0	0		0	0		0	0	0
MgMn10 Bosi et al. (2007) Mn not discriminated	0	0	0	0	0	0	0		0	0	0	0	0		0.127058	0	0	0	0.127058		0	0	0	0	0		0	0	0	0	0	0		0	0	0	0	0		0	0		0	0		0	0	0
MgMn01 Bosi et al. (2007) Mn discriminated	0	0	0	0	0	0	0		0	0	0	0	0		0.00525705	0	0	0	0.00525705		0	0	0	0	0		0	0	0	0	0	0		0	0	0	0	0		0	0		0	0		0	0	0
MgMn10 Bosi et al. (2007) Mn discriminated	0	0	0	0	0	0	0		0	0	0	0	0		0.126689	0	0	0	0.126689		0	0	0	0	0		0	0	0	0	0	0		0	0	0	0	0		0	0		0	0		0	0	0
Coulsonite I Kompanchenko (2020)	0	0	0	0	0	0	0		0.0922532	0	0.0922532	0.0922532	0		0	0	0	0	0		0	22.2732	22.2732	22.2732	0		0	0	0	0	0	0		0	0	0	0	0		0	0.186907		0	0.0083916		0	22.6141	22.6141
Coulsonite III Kompanchenko (2020)	0	0	0	0	0	0	0		0.00311268	0.00311268	0.00311268	0.00311268	0		0	0	0	0	0		0	7.64646	7.64646	7.64646	0		0	1.88512	1.88512	1.88512	0	0		0	0.246535	0.246535	0.246535	0		0	0.140063		0	0.0183173		0	7.88404	7.88404
[truncated: 47 more columns]
